# Supplementary material
Source: MDPI journal article supplement (https://www.mdpi.com/2227-9717/11/7/1888)
Supplement: s1 [file s1]

**Table S1: Different mobile phases used for optimization of the novel TLC-densitometric the assay of flumethasone pivalate and clioquinol.**

| Mobile phases                                  | Ratio in volumes |
|------------------------------------------------|------------------|
| Chloroform: methyl alcohol : ammonia           | 8:2: 0.2         |
| Chloroform: methyl alcohol : glacial acetic    | 2:8: 0.2         |
| Ethyl acetate: methyl alcohol : ammonia        | 8:2: 0.2         |
| Ethyl acetate: methyl alcohol : glacial acetic | 2:8: 0.2         |
| Hexane: acetone                                | 6:4              |
| Hexane: acetone                                | 2:8              |
| Benzene: acetone                               | 6:4              |
| Benzene: acetone                               | 2:8              |
| Ethyl acetate: benzene: formic acid            | 2:8:0.2          |
| Ethyl acetate: benzene: formic acid            | 8:2:0.2          |
| Ethyl acetate: benzene: formic acid            | 5:5:0.0          |
| Ethyl acetate: benzene: formic acid*           | 5:5:0.2          |

\*The optimal mobile phase

**Table S2: Comparasions for LOD and LOQ for the novel TLC-densitometric and UHPLC methods with refernces methods for the assay of flumethasone pivalate and clioquinol.**

| Refence Number | Items                            | TLC method            |                 | RP- UHPLC method      |                |
|----------------|----------------------------------|-----------------------|-----------------|-----------------------|----------------|
|                |                                  | flumethasone pivalate | clioquinol      | flumethasone pivalate | clioquinol     |
| New methods    | Limit of detection (LOD)         | 0.52<br>µg/band       | 0.63<br>µg/band | 1.52<br>µg/mL         | 1.47<br>µg/mL  |
|                | Limit of quantita-<br>tion (LOQ) | 1.57<br>µg/band       | 1.91<br>µg/band | 4.63<br>µg/mL         | 4.45<br>µg/mL  |
| Ref [16]       | LOD                              | 0.09<br>µg/band       | 0.41<br>µg/band | 1.34<br>µg/mL         | 2.58<br>µg/mL  |
|                | LOQ                              | 0.27<br>µg/band       | 1.23<br>µg/band | 4.02<br>µg/mL         | 7.74<br>µg/mL  |
| Ref [8]        | LOD                              | -----                 | -----           | Not mentioned         | -----          |
|                | LOQ                              | -----                 | -----           | 0.15<br>µg/mL         | -----          |
| Ref [9]        | LOD                              | -----                 | -----           | -----                 | Not mentioned* |

|                 |            |       |       |       |                                                         |
|-----------------|------------|-------|-------|-------|---------------------------------------------------------|
|                 | <b>LOQ</b> | ----- | ----- | ----- | Not mentioned *                                         |
| <b>Ref [10]</b> | <b>LOD</b> | ----- | ----- | ----- | Not mentioned*                                          |
|                 | <b>LOQ</b> | ----- | ----- | ----- | Not mentioned *                                         |
| <b>Ref [11]</b> | <b>LOD</b> | ----- | ----- | ----- | 0.42<br>µg/mL                                           |
|                 | <b>LOQ</b> | ----- | ----- | ----- | 1.72<br>µg/mL                                           |
| <b>Ref [12]</b> | <b>LOD</b> | ----- | ----- | ----- | 2<br>ng/mL in plasma ( electro-<br>chemical detection ) |
|                 | <b>LOQ</b> | ----- | ----- | ----- | 5<br>ng/mL in plasma ( electro-<br>chemical detection ) |

LOD and LOQ were Calculated from the equations [LOD =3.3 (Standard deviation / slope), LOQ = 3xLOD]

\* CL determined in cream and onitement without recording of calibration curve.
